# Supplementary material for: A novel approach coupling ferrous iron bio-oxidation and ferric iron chemo-reduction to promote biomineralization in simulated acidic mine drainage
Source: Royal Society of Chemistry journal article supplement (doi:10.1039/c8ra09887e), 2019-01-01
Supplement: c8ra09887e1.pdf [file c8ra09887e1.pdf]

## Supplementary Information

### **A Novel Approach Coupling Ferrous Iron Bio-oxidation and Ferric Iron Chemo-reduction to Promote Biomineralization in Simulated Acidic Mine Drainage**

**Authors:** Ning Wang,<sup>†a</sup> Di Fang,<sup>†a</sup> Guanyu Zheng,<sup>a</sup> Jianru Liang<sup>a</sup> and Lixiang Zhou<sup>\*a</sup>

**Affiliation:** College of Resources and Environmental Sciences, Nanjing Agricultural University, Nanjing 210095, China

<sup>†</sup> These authors contributed equally to the paper.

\* Author for correspondence: Lixiang Zhou

**Tel./Fax:** +86 25 84395160

**E-mail:** lxzhou@njau.edu.cn

**(A) AMD treatment by neutralization with lime**

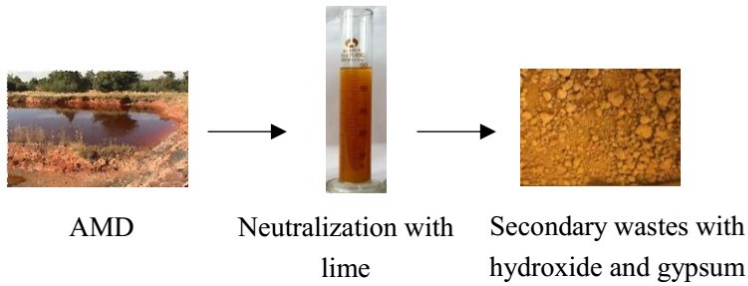

**(B) AMD treatment by ZVI coupling system before neutralization with lime**

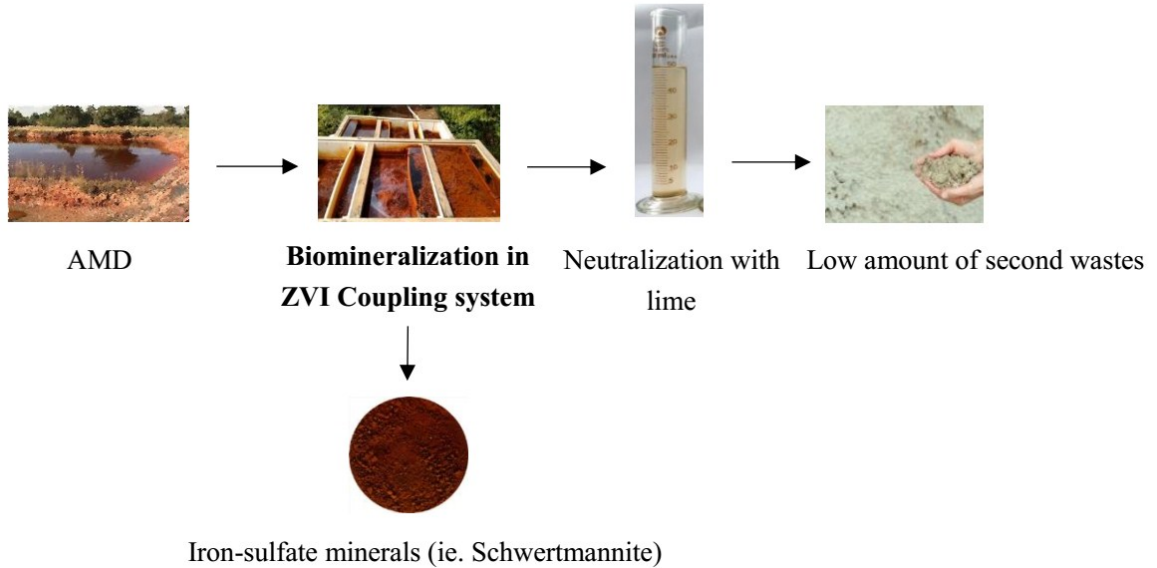

**Fig. S1** The flow chart of (A) AMD treatment by neutralization with lime and (B) AMD treatment by biological mineralization in *A. ferrooxidans* system coupling with zero-valent iron before neutralization with lime

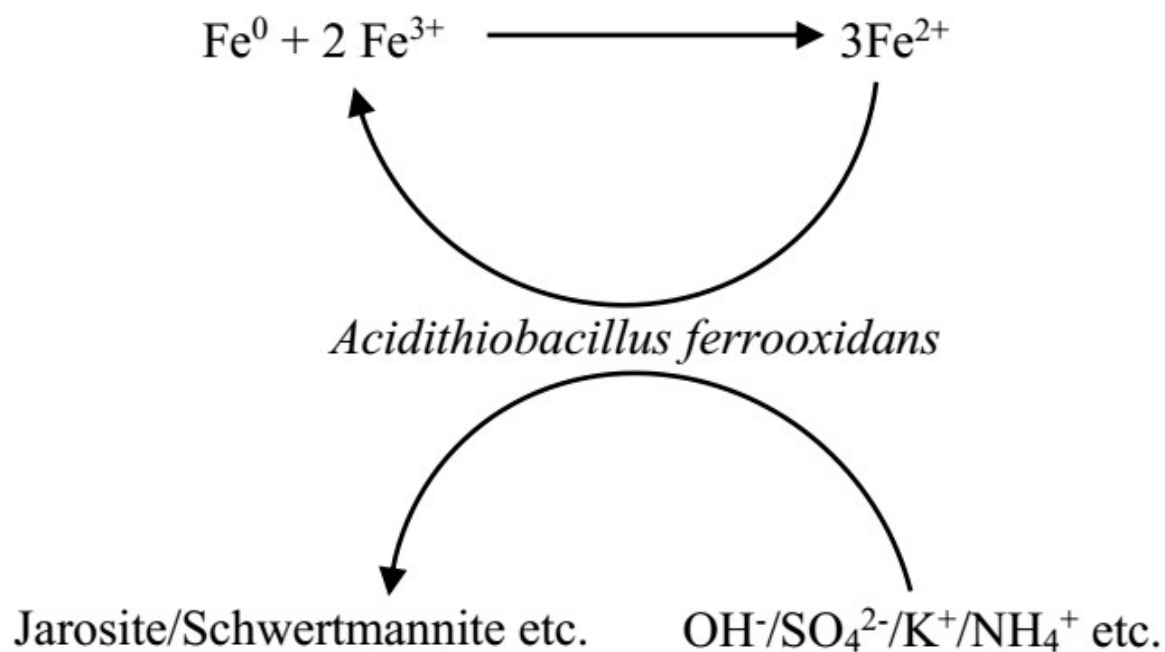

**Fig. S2** Diagram of coupling process of *A. ferrooxidans* mediated biological mineralization and chemical reduction with zero-valent iron.

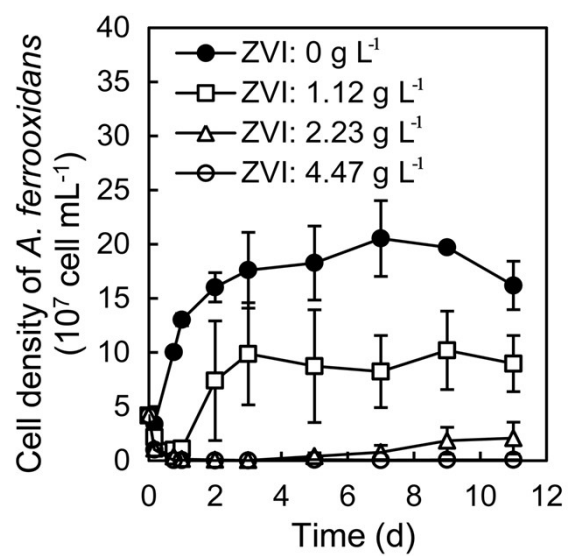

**Fig. S3** Toxicity of ZVI powder (1.12~4.47 g L<sup>-1</sup>) added initially to *A. ferrooxidans* density in bio-mineralization system.

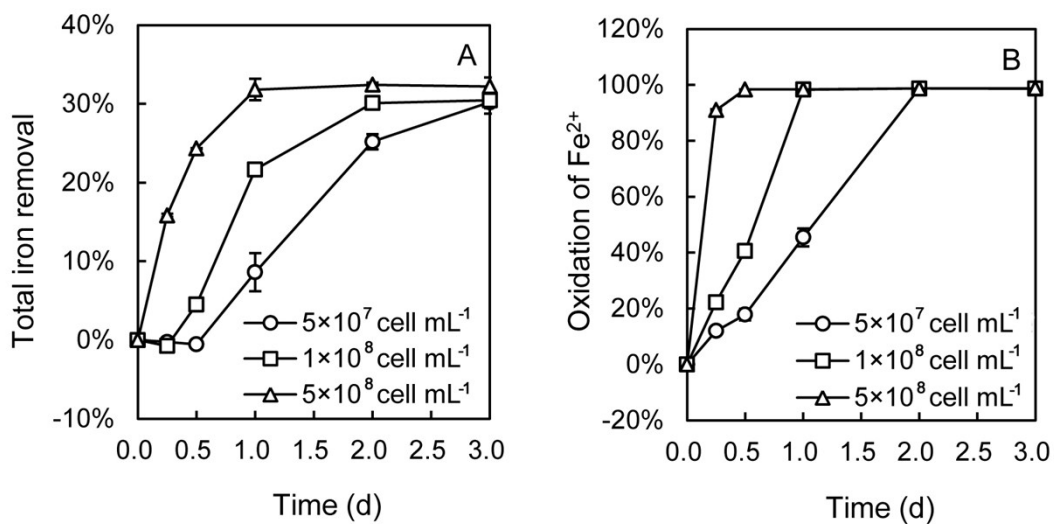

**Fig. S4** Total iron removal (A) and oxidation of Fe<sup>2+</sup> (B) in *A. ferrooxidans*-mediated bio-mineralization system inoculated with three cell density by 5 × 10<sup>7</sup>, 1 × 10<sup>8</sup>, 5 × 10<sup>8</sup> cell mL<sup>-1</sup> initially.

**Table S1** Amount of reductive reagents addition in approach coupling with bio-oxidation and chemo-reduction

|              | Amount of ZVI addition (g) |       |       |       |       |       |       |       |       |       |       |       |       |       |
|--------------|----------------------------|-------|-------|-------|-------|-------|-------|-------|-------|-------|-------|-------|-------|-------|
| Day          | 3                          | 5     | 7     | 9     | 11    | 13    | 15    | 17    | 19    | 21    | 23    | 25    | 27    | 29    |
| Exp. #1      |                            |       |       |       |       |       |       |       |       |       |       |       |       |       |
| ZVI          | 0.181                      | 0.157 | 0.134 | 0.122 | 0.108 | 0.095 | 0.077 | 0.07  | 0.068 | 0.05  | 0.04  | 0.04  | 0.04  | 0.03  |
| Exp. #2      |                            |       |       |       |       |       |       |       |       |       |       |       |       |       |
| ZVC ( Cu ) * | 0.224                      | 0.139 | 0.088 | 0.063 | 0.041 | 0.028 | 0.019 | 0.017 | 0.009 | 0.008 | 0.005 | 0.002 | 0.002 | 0.002 |
| ZVI ( Fe )   | 0.197                      | 0.173 | 0.154 | 0.136 | 0.127 | 0.109 | 0.103 | 0.093 | 0.079 | 0.073 | 0.067 | 0.059 | 0.053 | 0.048 |
| Exp. #3      |                            |       |       |       |       |       |       |       |       |       |       |       |       |       |
| T1-2d        | 0.210                      | 0.194 | 0.157 | 0.144 | 0.126 | 0.121 | 0.111 | 0.118 | 0.086 | 0.076 | 0.071 | 0.062 |       |       |
| T2-4d        | 0.210                      |       | 0.170 |       | 0.146 |       | 0.145 |       | 0.121 |       | 0.104 |       |       |       |
| T3-8d        | 0.210                      |       |       |       | 0.145 |       |       |       | 0.132 |       |       |       |       |       |
| Exp. #4      |                            |       |       |       |       |       |       |       |       |       |       |       |       |       |
| N-ZVI        | 0.189                      | 0.172 | 0.162 | 0.136 | 0.122 | 0.118 | 0.108 | 0.096 | 0.088 | 0.083 | 0.074 | 0.060 | 0.059 | 0.054 |
| NF-ZVI       | 0.191                      | 0.173 | 0.168 | 0.056 | 0.136 | 0.123 | 0.112 | 0.101 | 0.094 | 0.087 | 0.075 | 0.069 | 0.064 | 0.059 |
| Exp. #5      |                            |       |       |       |       |       |       |       |       |       |       |       |       |       |
| AMD-ZVI      | 0.310                      | 0.295 | 0.260 | 0.224 | 0.193 | 0.165 | 0.141 | 0.118 | 0.092 |       |       |       |       |       |

\*ZVC was added in system instead of ZVI.

**Table S2** ZVC and ZVI reductive efficiency

| Days | ZVC                                   |                                       |                    | ZVI                                   |                                       |                    |
|------|---------------------------------------|---------------------------------------|--------------------|---------------------------------------|---------------------------------------|--------------------|
|      | Before reduction                      | After reduction                       | Ratio of reduction | Before reduction                      | After reduction                       | Ratio of reduction |
|      | Fe <sup>3+</sup> [g L <sup>-1</sup> ] | Fe <sup>3+</sup> [g L <sup>-1</sup> ] |                    | Fe <sup>3+</sup> [g L <sup>-1</sup> ] | Fe <sup>3+</sup> [g L <sup>-1</sup> ] |                    |
| 3    | 28.33±0.08                            | 10.08±0.86                            | 0.64±0.03          | 28.58±0.24                            | 8.34±2.08                             | 0.71±0.07          |
| 5    | 17.57±0.42                            | 8.02±0.40                             | 0.54±0.02          | 24.78±0.75                            | 10.01±1.17                            | 0.59±0.06          |
| 7    | 10.95±0.27                            | 7.05±0.12                             | 0.36±0.03          | 21.76±0.37                            | 10.81±1.98                            | 0.50±0.09          |
| 9    | 7.91±0.15                             | 4.81±0.14                             | 0.39±0.01          | 19.51±0.20                            | 9.96±1.53                             | 0.49±0.08          |
| 11   | 5.22±0.15                             | 3.24±0.00                             | 0.38±0.02          | 18.04±0.39                            | 9.01±0.99                             | 0.50±0.04          |
| 13   | 3.49±0.10                             | 2.84±0.23                             | 0.19±0.05          | 15.66±0.62                            | 9.73±0.36                             | 0.38±0.02          |
| 15   | 2.41±0.20                             | 2.19±0.13                             | 0.09±0.03          | 14.71±0.68                            | 6.60±1.55                             | 0.55±0.13          |
| 17   | 2.11±0.08                             | 1.64±0.23                             | 0.22±0.08          | 13.35±0.62                            | 6.31±0.35                             | 0.53±0.05          |
| 19   | 1.16±0.10                             | 1.33±0.15                             | -0.15±0.14         | 11.29±0.99                            | 5.42±0.64                             | 0.52±0.06          |
| 21   | 1.02±0.10                             | 1.06±0.08                             | -0.05±0.06         | 10.46±1.15                            | 5.51±0.41                             | 0.47±0.05          |
| 23   | 0.61±0.16                             | 0.82±0.22                             | -0.34±0.10         | 9.55±1.26                             | 4.79±0.69                             | 0.48±0.12          |
| 25   | 0.21±0.10                             | 0.56±0.11                             | -2.35±1.57         | 8.41±1.09                             | 3.98±0.46                             | 0.52±0.10          |
| 27   | 0.19±0.16                             | 0.37±0.017                            | 1.46±3.02          | 7.64±0.92                             | 3.74±0.28                             | 0.51±0.04          |
| 29   | 0.27±0.10                             | 0.25±0.03                             | -0.06±0.37         | 6.93±1.04                             | 3.26±0.39                             | 0.52±0.06          |
